# Supplementary material for: Facile synthesis of flower-like hierarchical NiCo2O4 microspheres as high-performance cathode materials for Li–O2 batteries
Source: Royal Society of Chemistry journal article supplement (doi:10.1039/c6ra21414b), 2016-01-01
Supplement: c6ra21414b1.pdf [file c6ra21414b1.pdf]

## Supporting Information

### Facile synthesis of flower-like hierarchical NiCo<sub>2</sub>O<sub>4</sub> microspheres as high-performance cathode materials for Li-O<sub>2</sub> batteries

Liangjun Wang,<sup>a</sup> Ting Zhu,<sup>b</sup> Zhiyang Lyu,<sup>c</sup> Jian Zhang,<sup>c</sup> Lili Gong,<sup>a</sup> Shuning Xiao,<sup>d</sup> Jia Liu,<sup>e</sup> Wenhao Dong,<sup>c</sup> Xinhang Cui,<sup>a</sup> Ghim Wei Ho<sup>b</sup> and Wei Chen<sup>\*a,c,f,g,h</sup>

<sup>a</sup>Department of Physics, National University of Singapore, 2 Science Drive 3, 117542, Singapore. E-mail: phycw@nus.edu.sg; Fax: +65 6777 6126; Tel: +65 6516 2921

<sup>b</sup>Department of Electrical and Computer Engineering, National University of Singapore, 4 Engineering Drive 3, 117583, Singapore

<sup>c</sup>Department of Chemistry, National University of Singapore, 3 Science Drive 3, 117543, Singapore

<sup>d</sup>Education Ministry Key Lab of Resource Chemistry, Shanghai Key Laboratory of Rare Earth Functional Materials, International Joint Lab of Resource Chemistry SHNU-NUS-PU, Department of Chemistry, Shanghai Normal University, Shanghai 200234, China.

<sup>e</sup>Division of Chemistry and Biological Chemistry, School of Physical and Mathematical Sciences, Nanyang Technological University, 21 Nanyang Link, 637371, Singapore

<sup>f</sup>Centre for Advanced 2D Materials and Graphene Research Centre, National University of Singapore, 6 Science Drive 2, 117546, Singapore

<sup>g</sup>National University of Singapore (Suzhou) Research Institute, Suzhou 215123, China

<sup>h</sup>SZU-NUS Collaborative Innovation Center for Optoelectronic Science & Technology, Shenzhen University, Shenzhen 518060, China

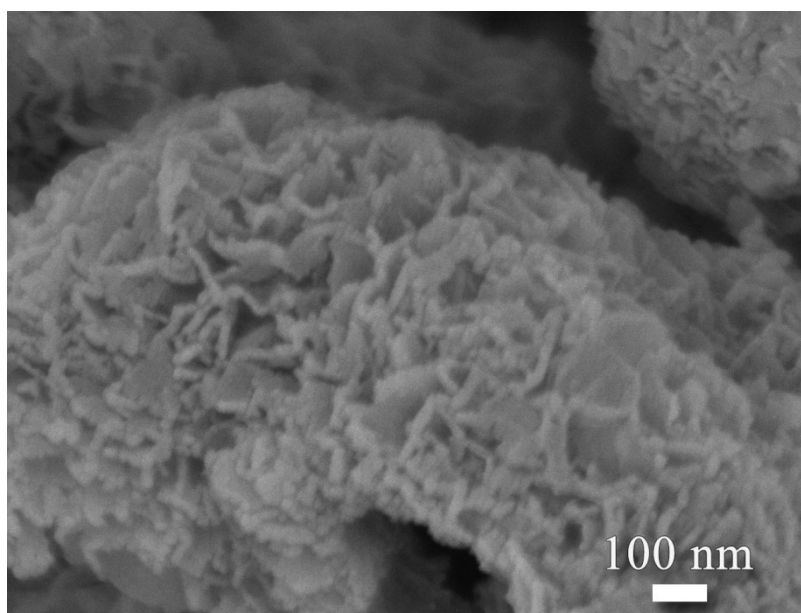

**Fig. S1** SEM image of individual broken NiCo<sub>2</sub>O<sub>4</sub> microspheres.

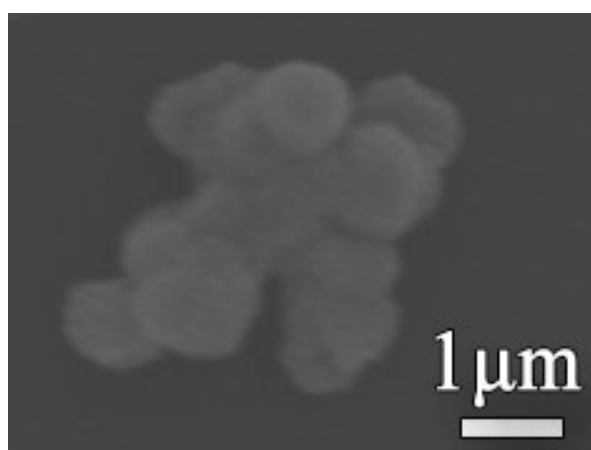

**Fig. S2** SEM image that represents the elemental mapping.

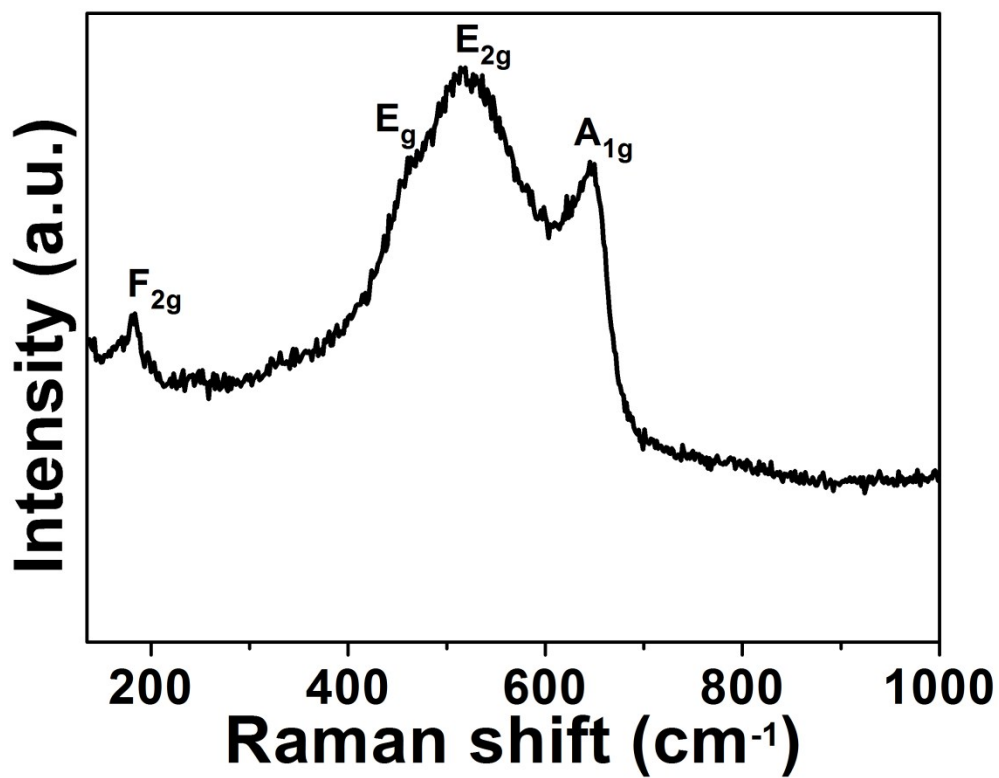

Fig. S3 (a) Raman spectra of as-prepared  $\text{NiCo}_2\text{O}_4$  microspheres.

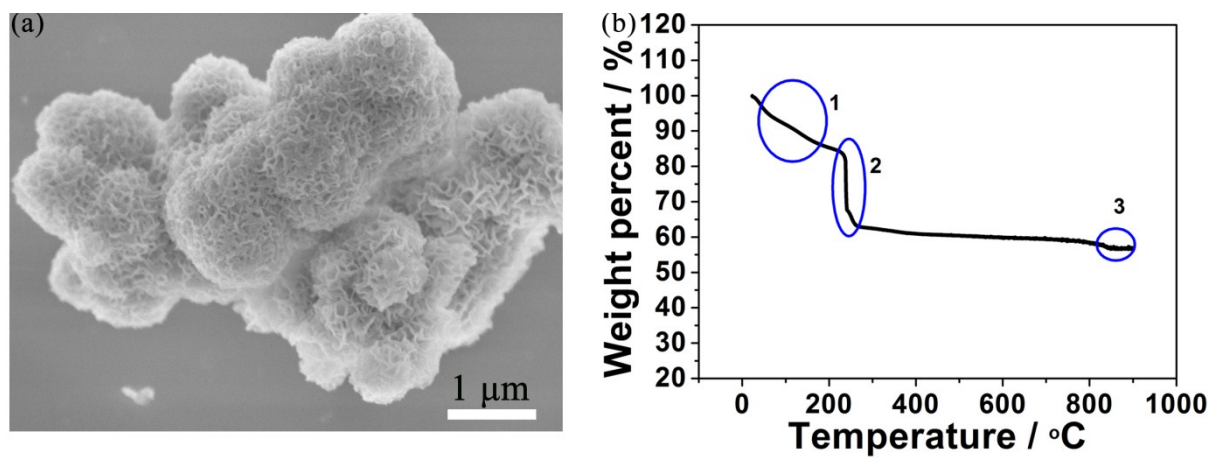

Fig. S4 (a) SEM image and (b) TGA curves of  $\text{NiCo}_2\text{O}_4$  microspheres precursor.

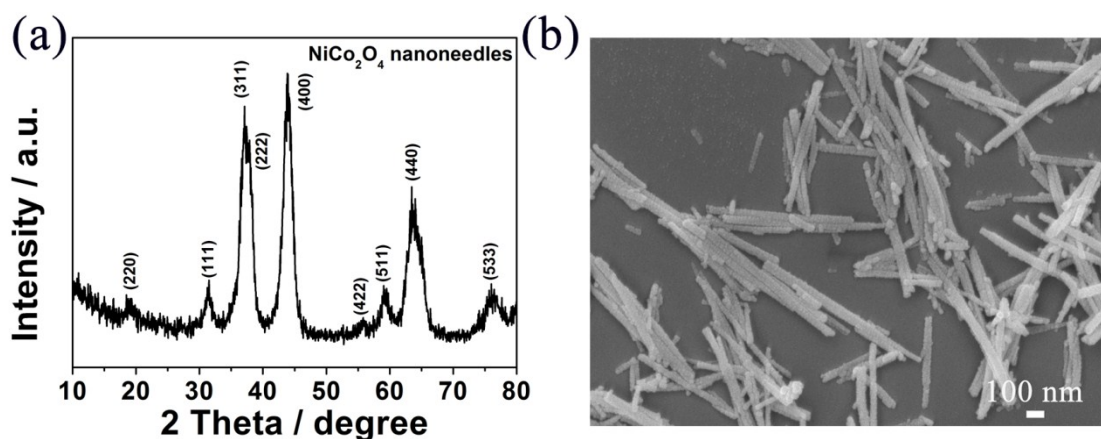

**Fig. S5** (a) XRD pattern and (b) SEM image of as-prepared NiCo<sub>2</sub>O<sub>4</sub> nanoneedles.

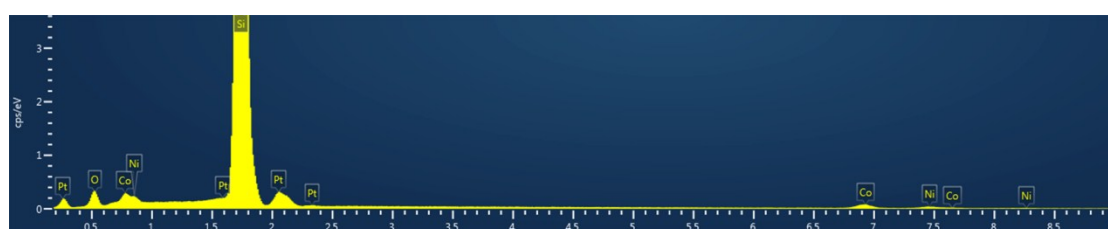

**Fig. S6** EDX patterns of the as-prepared NiCo<sub>2</sub>O<sub>4</sub> microspheres. It should be noted that Si signal is attributed to that the used Si substrate and Pt signal comes from Pt sputtering to get a clear FESEM images.

| Cathode material                                         | Discharge/charge Voltage gap (V)                                          | Ref.     |
|----------------------------------------------------------|---------------------------------------------------------------------------|----------|
| Mesoporous NiCo <sub>2</sub> O <sub>4</sub> nanoflakes   | ~1.3                                                                      | 1        |
| Ordered mesoporous NiCo <sub>2</sub> O <sub>4</sub>      | ~1.15                                                                     | 2        |
| Hierarchical NiCo <sub>2</sub> O <sub>4</sub> nanorods   | ~1.1                                                                      | 3        |
| Hierarchical porous NiCo <sub>2</sub> O <sub>4</sub> @Ni | Discharge: sloping from 2.6 to 2.3 V<br>Charge: sloping from 3.5 to 4.1 V | 4        |
| Urchin-like spinel NiCo <sub>2</sub> O <sub>4</sub>      | ~1.05                                                                     | 5        |
| NiCo <sub>2</sub> O <sub>4</sub> nanoneedles             | 1.25                                                                      | Our work |
| NiCo <sub>2</sub> O <sub>4</sub> microspheres            | 0.86                                                                      |          |

**Table S1** A summary of previous results about NiCo<sub>2</sub>O<sub>4</sub> based cathode for Li-O<sub>2</sub> batteries.

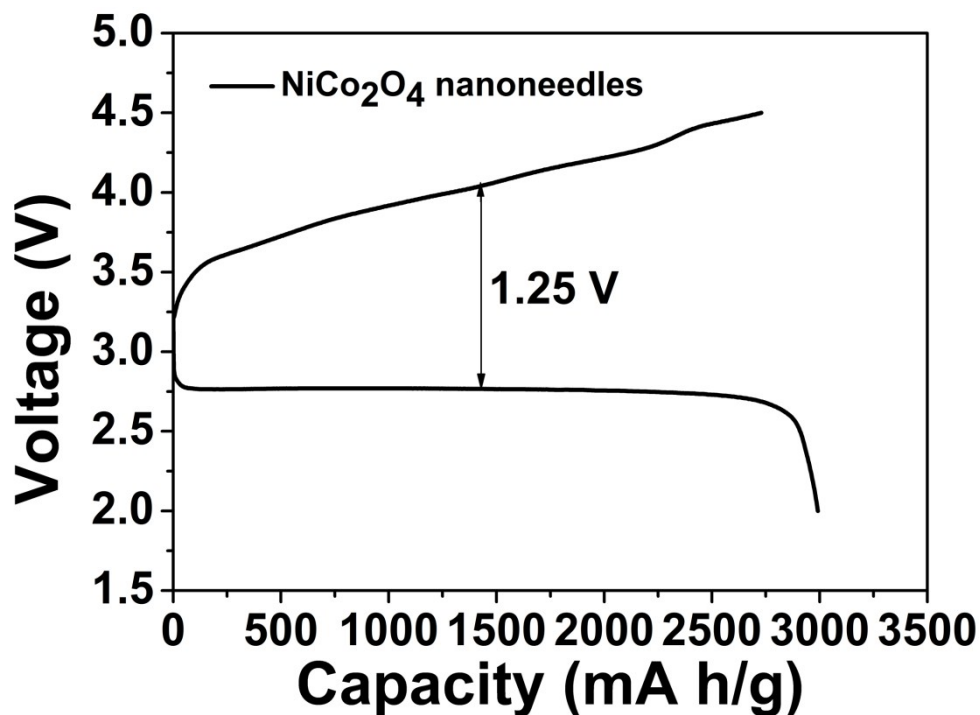

**Fig. S7** First full discharge/charge profiles of Li-O<sub>2</sub> batteries with NiCo<sub>2</sub>O<sub>4</sub> nanoneedles cathodes at a current density of 0.08 mA/cm<sup>2</sup>.

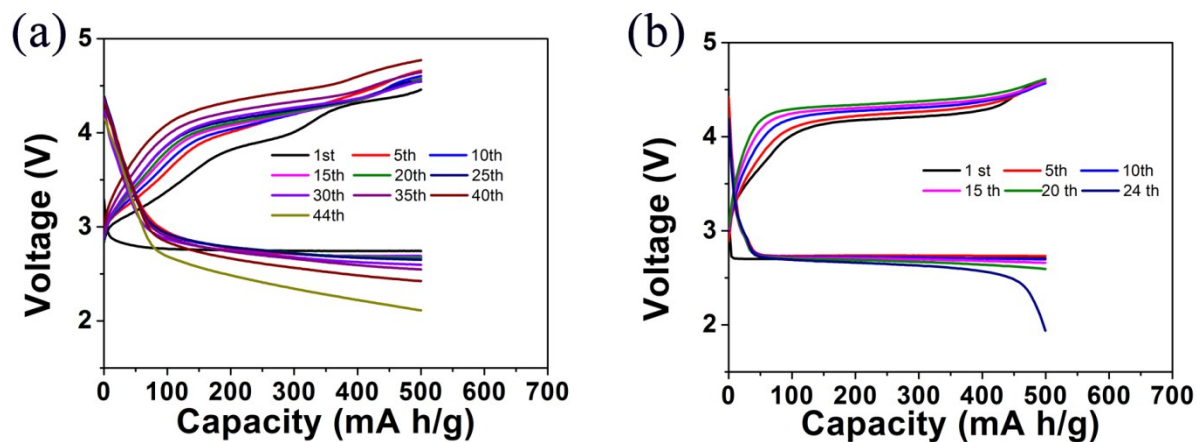

**Fig. S8** Cycling performance of Li-O<sub>2</sub> batteries with (a) NiCo<sub>2</sub>O<sub>4</sub> nanoneedles and (b) bare VX-72 carbon cathode at 500 mA h/g capacity limit.

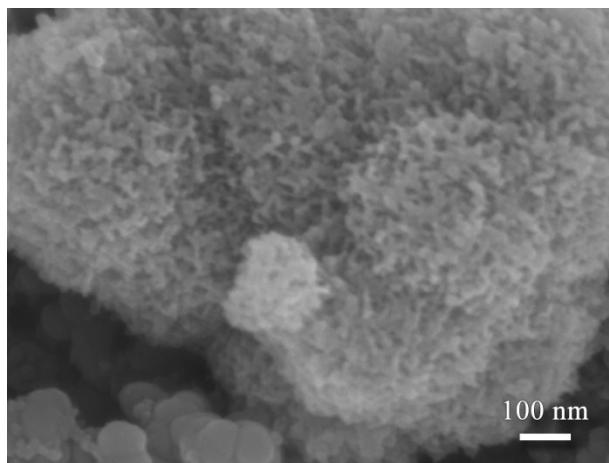

**Fig. S9** SEM image of NiCo<sub>2</sub>O<sub>4</sub> microspheres electrode after 60 cycles.

#### References

1. L. Zhang, S. Zhang, K. Zhang, G. Xu, X. He, S. Dong, Z. Liu, C. Huang, L. Gu and G. Cui, *Chem. Commun.*, 2013, **49**, 3540-3542.
2. Y. Li, L. Zou, J. Li, K. Guo, X. Dong, X. Li, X. Xue, H. Zhang and H. Yang, *Electrochim. Acta*, 2014, **129**, 14-20.
3. B. Sun, J. Zhang, P. Munroe, H.-J. Ahn and G. Wang, *Electrochem. Commun.*, 2013, **31**, 88-91.
4. X. Lin, J. Su, L. Li and A. Yu, *Electrochim. Acta*, 2015, **168**, 292-299.
5. H. S. Jadhav, R. S. Kalubarme, J. W. Roh, K. N. Jung, K. H. Shin, C. N. Park and C. J. Park, *J. Electrochem. Soc.*, 2014, **161**, A2188-A2196.
